# Supplementary material for: A double-blind randomised controlled investigation into the efficacy of Mirococept (APT070) for preventing ischaemia reperfusion injury in the kidney allograft (EMPIRIKAL): study protocol for a randomised controlled trial
Source: Springer Nature journal article supplement (doi:10.1186/s13063-017-1972-x), 2017-06-06
Supplement: MOESM4 [file 12342572]

# EMPIRIKAL TRIAL

## CLINICAL TRIAL LABORATORY MANUAL

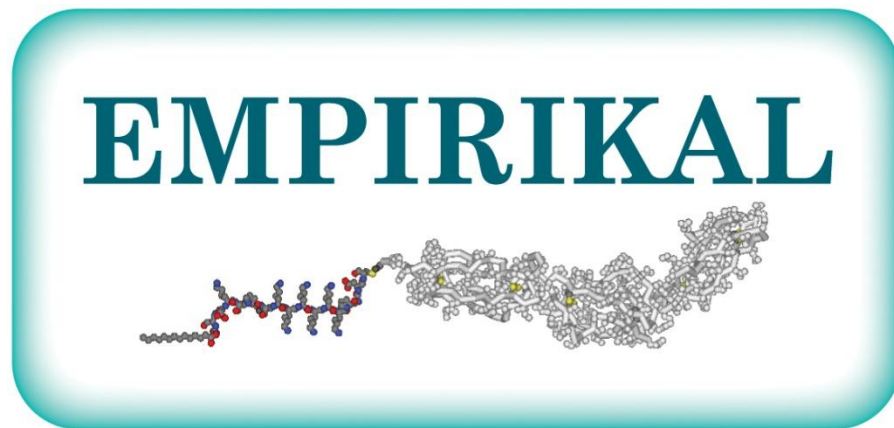

Version 4.0, dated 11<sup>th</sup> May 2016

**KING'S**  
*College*  
**LONDON**

**MRC** | Centre for  
Transplantation

**NHS**  
*National Institute for  
Health Research*

## Table of Contents

|                                                                         |    |
|-------------------------------------------------------------------------|----|
| Approvals .....                                                         | 3  |
| Contact details .....                                                   | 4  |
| Abbreviations .....                                                     | 5  |
| Flow Diagram 1: Summary of EMPIRIKAL Sample Collections.....            | 7  |
| Table 1: Research Samples Summary Table.....                            | 8  |
| 1. Introduction .....                                                   | 10 |
| 1.1 Funded Costs.....                                                   | 10 |
| 1.2 Patient Packs.....                                                  | 10 |
| 1.3 EMPIRIKAL Progeny Database for Sample Tracking.....                 | 11 |
| 1.4 Equipment Requirements .....                                        | 12 |
| 2. Blood Sample Collection .....                                        | 12 |
| 2.1 Serum for complement and antibodies to Mirococept .....             | 12 |
| 2.3 Whole Blood Biomarker RNA ( <i>cohort one patients only</i> ) ..... | 14 |
| 2.4 Plasma sample for SDMA levels.....                                  | 15 |
| 3. Urine Sample Collection.....                                         | 16 |
| 3.1 Urine Filter Paper Samples.....                                     | 16 |
| 3.2 Urine Sample for C3a levels .....                                   | 18 |
| 3.3 Biomarker RNA urine <i>Guy's cohort one only</i> .....              | 18 |
| 4. Research Biopsy Tissue Collections.....                              | 19 |
| 4.1 Guy's only Research Biopsy tissue collection.....                   | 19 |
| 5. Shipping of samples .....                                            | 19 |
| Appendix A: Barcode labelling .....                                     | 20 |
| Appendix B: Research Samples Summary Table.....                         | 21 |
| Appendix C: Previous Versions .....                                     | 22 |

## Approvals

### **A Double Blind Randomised Controlled Investigation into the efficacy of Mirococept (APT070) for preventing ischaemia-reperfusion injury in the kidney allograft (EMPIRIKAL)**

Document Author: Laura Nichols, King's College London

The final version of the laboratory manual has been approved by:

Dr. Richard Smith, King's College London – Director of Protein Therapeutics

Signature \_\_\_\_\_ Date \_\_\_\_\_

### **Contact details**

ALWAYS SEND EMAIL NOTIFICATION TO [\*\*laura.nichols@kcl.ac.uk\*\*](mailto:laura.nichols@kcl.ac.uk)  
PRIOR TO THE SHIPMENT OF ANY SAMPLES

#### **EMPIRIKAL Trial Office, Guy's Hospital**

All EMPIRIKAL trial enquiries should be directed to:

Laura Nichols, EMPIRIKAL Clinical Project Manager, Division of Transplantation Immunology & Mucosal Biology, MRC Centre for Transplantation, King's College London, 5th Floor Tower Wing, Guy's Hospital, Great Maze Pond, London, SE1 9RT.

Email: [laura.nichols@kcl.ac.uk](mailto:laura.nichols@kcl.ac.uk)

Tel: 020 7188 0616,

Fax: 020 7188 5660

#### **Protein Therapeutics Laboratory, Guy's Hospital**

Dr. Richard Smith/Dr. Roseanna Greenlaw, Division of Transplantation Immunology & Mucosal Biology, MRC Centre for Transplantation, King's College London, 5th Floor Tower Wing, Guy's Hospital, Great Maze Pond, London, SE1 9RT.

Email: [richard.a.smith@kcl.ac.uk](mailto:richard.a.smith@kcl.ac.uk); [roseanna.greenlaw@kcl.ac.uk](mailto:roseanna.greenlaw@kcl.ac.uk)

Tel: 0207188 8567/1527

Fax: 020 7188 5660

#### **WellChild Laboratories**

Professor Neil Dalton, WellChild Laboratory. King's College London, Arctic (1st Floor), Evelina Children's Hospital, St Thomas' Hospital, Lambeth Palace Road, London, SE1 7EH.

Tel: 0207 188 0159

## Abbreviations

| Abbreviation | Definition                                           |
|--------------|------------------------------------------------------|
| Abs          | Antibodies                                           |
| AE           | Adverse Event                                        |
| ALT          | Alanine aminotransferase                             |
| APT070       | Mirococept                                           |
| AR           | Adverse Reaction                                     |
| AUC          | Area Under Curve                                     |
| BMI          | Body Mass Index                                      |
| BPAR         | Biopsy-proven acute rejection                        |
| CCD          | Cumulative Cohort Design                             |
| CCP          | Complement Control Protein                           |
| CMV          | Cytomegalovirus                                      |
| CNI          | Calcineurin inhibitor                                |
| CRF          | Case Report Form                                     |
| DBD          | Donation after brain-death                           |
| DCD          | Donation after Circulatory Death                     |
| DGF          | Delayed Graft Function                               |
| DSMB         | Data Safety Monitoring Board                         |
| eGFR         | Estimated Glomerular Filtration Rate                 |
| GCP          | Good Clinical Practice                               |
| $\alpha$ GST | Alpha glutathione S-transferase                      |
| GGT          | Gamma-glutamyl transferase                           |
| HBV          | Hepatitis B Virus                                    |
| HCV          | Hepatitis C Virus                                    |
| HIV          | Human immunodeficiency virus                         |
| HLA          | human leukocyte antigen                              |
| HTAct        | Human Tissue Act                                     |
| IMP          | Investigational Medicinal Product                    |
| IRI          | Ischaemia Reperfusion Injury                         |
| KHP- CTO     | King's Health Partners Clinical Trials Office        |
| MDRD         | Modification of diet in renal disease study equation |
| MAC          | Membrane attack complex                              |
| MED          | Minimum Effective Dose                               |
| MHRA         | Medicines & Healthcare products Regulatory Agency    |
| MMF          | Mycophenolate mofetil                                |
| MRC          | Medical Research Council                             |
| MRIS         | Medical Research Information Service                 |
| NICE         | National Institute for Clinical Excellence           |

|                |                                                         |
|----------------|---------------------------------------------------------|
| NGAL           | Neutrophil gelatinase-associated lipocalin              |
| NAG            | N-acetyl- $\beta$ -D-glucosaminidase                    |
| NRES           | National Research Ethics Service                        |
| PBS            | Phosphate buffered saline                               |
| PJP            | Pneumocystis jiroveci pneumonia                         |
| PK             | Pharmacokinetics                                        |
| PTL            | Protein Therapeutics Laboratory                         |
| PTLD           | Post-transplant lymphoproliferative disorder            |
| RCA            | Regulators of complement activation                     |
| REC            | Research Ethics Committee                               |
| RBP            | Retinol binding protein                                 |
| RNA            | Ribonucleic acid                                        |
| RT             | Room temperature                                        |
| SAE            | Serious Adverse Event                                   |
| SCr            | Serum creatinine                                        |
| SDMA           | Symmetric dimethylarginine                              |
| SOP            | Standard Operating Procedure                            |
| SPC / SmPC     | Summary of Product Characteristics                      |
| SST            | Serum Separating Tube                                   |
| SUSAR          | Suspected Unexpected Serious Adverse Reaction           |
| T <sub>0</sub> | Time zero- before transplantation of the perfused organ |
| T <sub>1</sub> | After transplant 1 hour post perfusion with blood       |
| T <sub>4</sub> | After transplant 4 hours post perfusion with blood      |
| TMG            | Trial Management Group                                  |
| TSC            | Trial Steering Committee                                |
| UW             | University of Wisconsin solution                        |
| V <sub>z</sub> | Mean volume of distribution                             |
| WCL            | WellChild Laboratory                                    |

## Flow Diagram 1: Summary of EMPIRIKAL Sample Collections

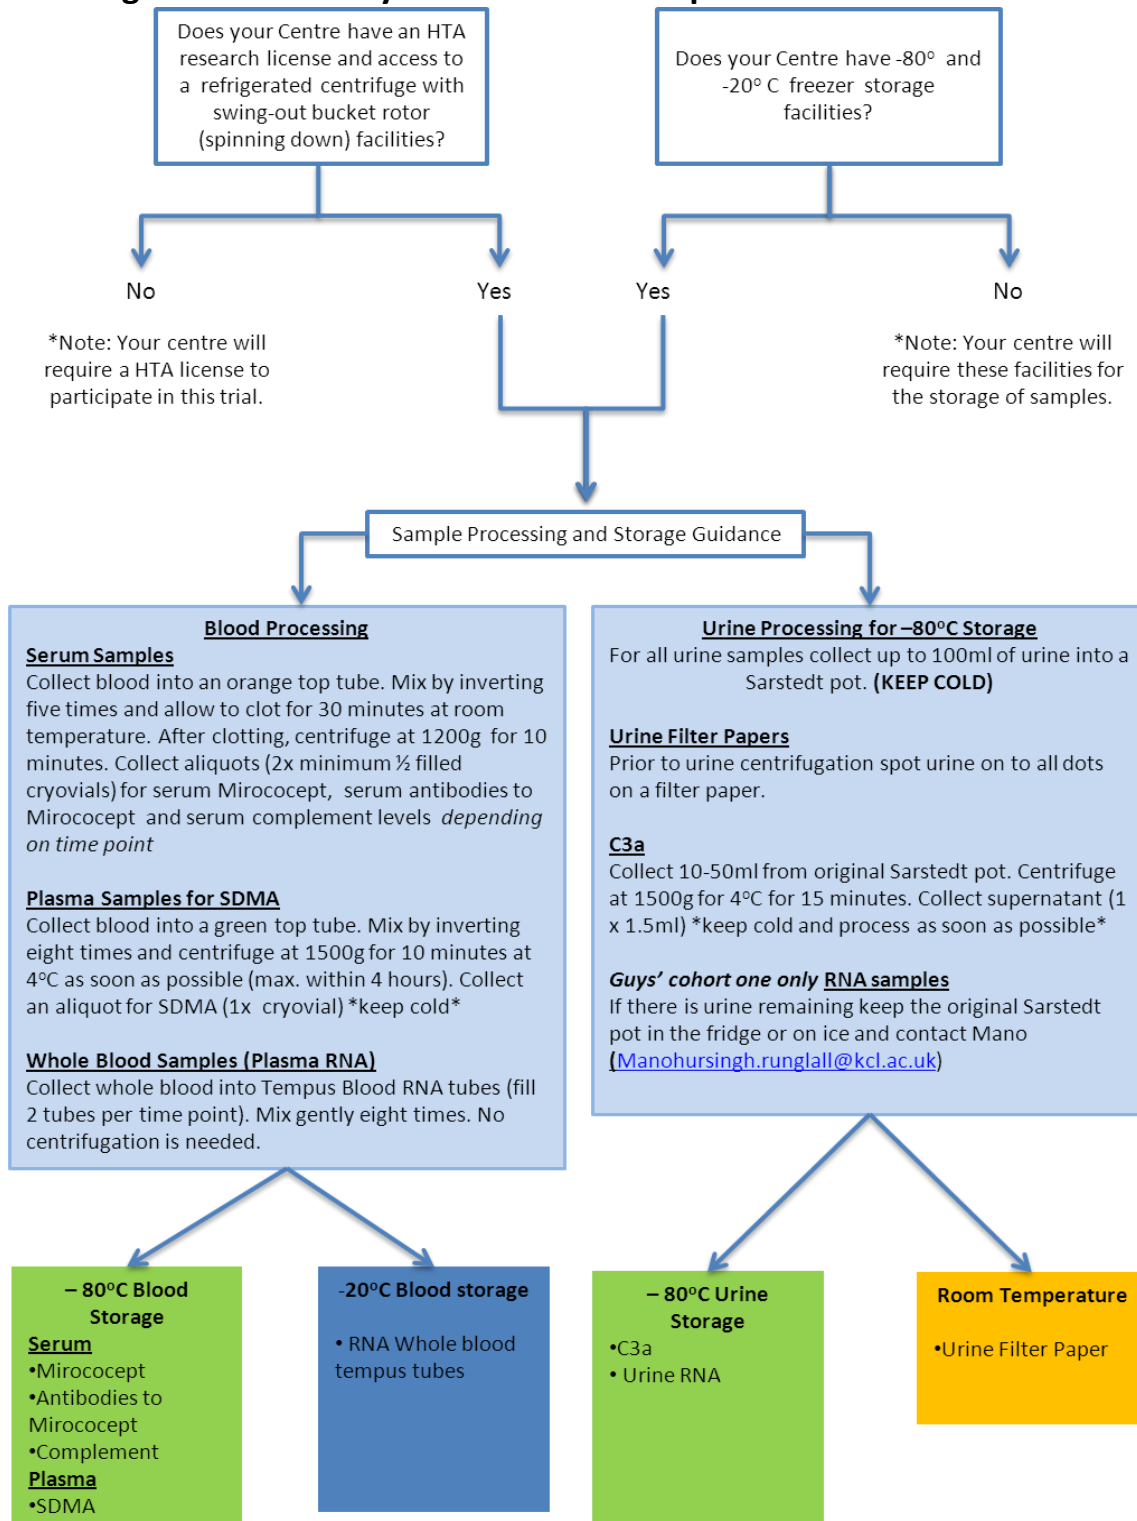

**All centrifugation needs to use a swing-out bucket rotor  
Centrifugation speeds are given as 'g' not rpm**

**Table 1: Research Samples Summary Table**

| Assessment                         | BL/<br>Day 0     | Day 1 | Day 2 | Day 3 | Day 4 | Day 7      | Wk 2                                     | Wk 3 | Wk 4 | Wk 5 | Wk 6 | Wk 7 | Wk 8 | Wk 9 | Wk 10 | Wk 11 | Wk 12 | Wk 24       | Wk 36 | Wk 52 |
|------------------------------------|------------------|-------|-------|-------|-------|------------|------------------------------------------|------|------|------|------|------|------|------|-------|-------|-------|-------------|-------|-------|
| Visit Window                       | Completed on day |       |       |       |       | +/- 2 days | Anytime in specified week (7 day window) |      |      |      |      |      |      |      |       |       |       | +/- 2 weeks |       |       |
| Serum for complement levels        | x                | Δ     | Δ     | Δ     | Δ     |            | Δ                                        |      | Δ    |      |      |      |      |      |       |       |       |             |       |       |
| Serum for antibodies to Mirococept |                  |       |       |       |       |            | Δ                                        |      | Δ    |      |      |      |      |      | Δ     |       |       |             |       |       |
| Plasma SDMA levels                 | Δ                | Δ     | Δ     |       |       | Δ          |                                          |      |      |      |      |      |      |      |       |       |       |             |       | Δ     |
| Urine filter papers                |                  | Δ     | Δ     |       |       | Δ          |                                          |      |      |      |      |      |      |      |       |       |       |             |       | Δ     |
| Urine for C3a levels               |                  | Δ     | Δ     |       |       |            |                                          | Δ    |      |      |      |      |      |      | Δ     | Δ     | Δ     | Δ           | Δ     | Δ     |
| Whole blood RNA                    |                  | Δb    | Δb    |       |       | Δb         | Δb                                       |      | Δb   |      |      |      | Δb   |      |       |       | Δb    | Δb          | Δb    | Δb    |
| Guy's Patients Only                |                  |       |       |       |       |            |                                          |      |      |      |      |      |      |      |       |       |       |             |       |       |
| Biopsy                             | Δa               |       |       |       |       |            |                                          |      |      |      |      |      |      |      |       |       | Δ     |             |       |       |
| Serum for complement levels        | Xc               |       |       |       |       |            |                                          |      |      |      |      |      |      |      |       |       |       |             |       |       |
| Serum for Mirococept levels        |                  | Δ     |       |       |       |            |                                          |      |      |      |      |      |      |      |       |       |       |             |       |       |
| Urine RNA                          |                  | Δb    | Δb    |       |       | Δb         | Δb                                       |      | Δb   |      |      |      | Δb   |      |       |       | Δb    | Δb          | Δb    | Δb    |



**Key**

| Symbol                                                                               |                                                                                                                |
|--------------------------------------------------------------------------------------|----------------------------------------------------------------------------------------------------------------|
| • <b>BL</b> = baseline                                                               | • <b>Δb</b> = cohort 1 patients only                                                                           |
| • <b>X</b> = essential                                                               | • <b>Δ</b> = desirable                                                                                         |
| Assessment Windows                                                                   |                                                                                                                |
| Assessments must be completed on day specified                                       |                                                                                                                |
| Assessments completed +/- 2 days of this time point                                  |                                                                                                                |
| Assessments completed anytime in that 7 day window                                   |                                                                                                                |
| Assessments completed +/- 2 weeks of that time point                                 |                                                                                                                |
| Guy's Patients Only                                                                  |                                                                                                                |
| • <b>Δa</b> = ½ of 1 core taken before organ perfusion & 1 post perfusion with blood | • <b>Δc</b> = to be taken T <sub>0</sub> (before transplantation), 1hr and 4hr following perfusion with blood) |

**NB**

The above assessments all form part of the routine management of renal transplant assessments with the exception of the following;

- serum for complement levels
- serum for antibodies to Mirococept
- serum for Mirococept levels (only at Guy's site)
- plasma for SDMA levels
- urine for markers of tubular damage (RBP, NAG and NGAL)
- urine RNA
- urine for C3a levels
- whole blood RNA
- renal biopsy for research (only collected at Guy's site)
- **Where an "x" is contained within a field this denotes that the associated data is essential and if missed will be classified as a protocol deviation.**
- **Where an "Δ" is contained within a field this denotes that the associated data is desirable and while every effort should be made to record these data missing data will NOT constitute a protocol deviation.**

## 1. Introduction

The purpose of this manual is to describe the collection, site processing and transportation of blood, urine and biopsy tissue samples for the EMPIRIKAL trial. This document should be used in conjunction with the EMPIRIKAL trial protocol.

The following research samples are required, in addition to the routine laboratory investigations outlined in the protocol, from **all patients at all participating centres** unless otherwise stated:

1. Serum for complement levels
2. Serum for antibodies to Mirococept
3. Plasma for SDMA levels
4. Urine for markers of tubular damage – RBP, NAG, NGAL albumin and creatinine (on filter papers)
5. Urine for C3a levels
6. **Cohort one only** Whole blood RNA for biomarkers

### Guy's site only

1. Serum for Mirococept levels
2. **Cohort one only** Urine for biomarkers
3. Renal biopsy specimens for research (optional)

Although serum, plasma and spun urine do not fall under the Human Tissue Act (HTAct) as relevant material, all samples will be processed, tracked and stored according to HTAct 2004 and the EU Directive Guidelines.

All participants' samples will be shipped, when requested, from recruiting centres to the Protein Therapeutics Laboratory (PTL). The PTL will sort and send relevant samples to the WellChild Laboratory (WCL).

In order to preserve the integrity of the patient samples (and comply with the clinical trials regulations), we request that staff at participating centres collect, handle, process and store patient samples at their centre in accordance with these instructions.

### 1.1 Funded Costs

Sample collection for the study has been funded by the Medical Research Council (MRC) via the study grant. The trial team will supply all of the consumables associated with sample collection and storage. Collection and transportation, on dry ice, to the PTL will be arranged and paid for by the EMPIRIKAL Clinical Project Manager.

### 1.2 Patient Packs

Each participating centre will receive EMPIRIKAL patient packs for the collection of non-routine samples required for the trial. Packs will contain:

- Serum vacutainer tubes (Orange topped tubes)

## CONFIDENTIAL

- Lithium heparin vacutainer tubes (Green topped tubes)
- Tempus blood RNA tubes (Blue topped tubes)
- 100ml Sarstedt urine pots
- Stickers to be put onto urine pots
- 1.5ml cryovials
- Urine filter cards in foil bags with dessicant tablet
- Sterile pipettes
- 50ml Falcon tubes
- Pre-paid mailing envelopes for the return of filter papers (address labels also provided)
- Stickers for labelling blood vacutainer and tempus tubes
- Copies of Baseline Sample Tracking Forms
- Copies of Post Transplant Sample Tracking Forms
- Labelled box for storage of cryovials at -80°C
- Labelled Tempus tube rack for storage of tempus tubes at -20°C
- Blank paper cryovial box map (to document storage location of samples at -80°C)
- Blank paper tempus rack map (to document storage location of samples at -20°C)
- Individual sample barcodes to affix to cryovials once filled (see Appendix A)

### ***Guy's only***

- 1.5ml cryovial containing 1.5ml Michels solution (will be stored in the designated theatre fridge until used, thereafter at room temperature).

The above supplies will be sent to site initially and should you run low on anything please let the EMPIRIKAL Clinical Project Manager know and further supplies will be sent.

Centres will be provided with storage boxes and racks for the storage of samples at their site. These boxes and racks are to be used when shipping samples back to the PTL and replaced with new boxes and racks.

### **1.3 EMPIRIKAL Progeny Database for Sample Tracking**

All EMPIRIKAL participants' samples must be logged on the EMPIRIKAL Progeny database, unless stated otherwise in the instructions below. Participants at each centre will be pre-generated on the database; numbered 001, 002, and 003 at each site and so on. The number will match that given to the patient at randomisation on MACRO and Sealed Envelope (refer to the protocol and randomization step by step instructions for further information). One Progeny log in will be provided per centre.

Following the randomisation of the participant, a Progeny trained member of staff will need to log in to the Progeny system <https://labsamples.kcl.ac.uk/#1> and enter basic participant's details. Please refer to the EMPIRIKAL Progeny Database User Guide for further detail on using the Progeny system.

In addition to Progeny, paper records of samples taken will be kept; recording the time and date a sample was collected and processed. Research Sample Tracking Forms will be provided to site (two forms; one to be used for baseline samples only and another to be used at all time points for all samples collected post-transplant).

## 1.4 Equipment Requirements

The following equipment is essential and required to complete sample processing and/or storage:

- -80oC freezer for storage of sera, plasma and urine C3a samples.
- -20oC freezer for storage of whole blood Tempus tubes.
- Refrigerated swing-out bucket centrifuge for spinning samples.

All participating centres confirmed they had access to the above facilities prior to being approved as a research site.

## 2. Blood Sample Collection

Key points to note for blood sample collection:

- **Samples for serum (complement, antibodies for Mirococept and Mirococept) should be collected in the orange topped tubes and, after mixing well, can be left unprocessed for up to 72 hours following collection. This means samples can be collected over the weekend and left at room temperature prior to processing the next working day.**
- **Samples for plasma (SDMA) should be collected in green topped tubes and must be processed within 4 hours of collection. If this isn't going to be possible (e.g. over the weekend) do not collect the sample.**
- **Whole Blood (RNA) should be collected in blue topped tempus tubes and after mixing well can be left for up to 72 hours before being stored at -20oC. This means samples can be collected over the weekend and left at room temperature prior to storage the next working day.**
- **All blood samples must be stored at room temperature following collection prior to processing.**

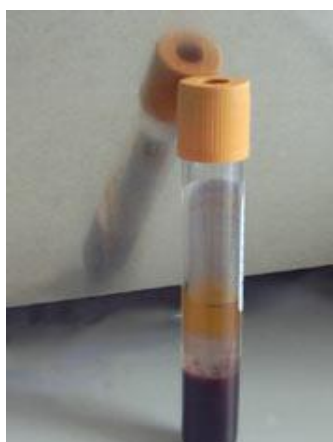

Figure 1: Orange topped serum separator tube

### 2.1 Serum for complement and antibodies to Mirococept

Use the method below for processing both the serum complement samples and serum antibodies to Mirococept samples. At Guy's only this method should also be used when processing the serum Mirococept samples.

1. Fill the **orange** topped tube to the fill line and invert 5 times to mix then leave to clot for 30 minutes at room temperature (Figure 1).
2. Record the date and time of sample collection on the research sample tracking form.
3. Centrifuge the tube at **room temperature** at **1200g** for **10 minutes** in a swing-out bucket rotor to obtain serum (Figure 3).

Unspun orange top blood tube

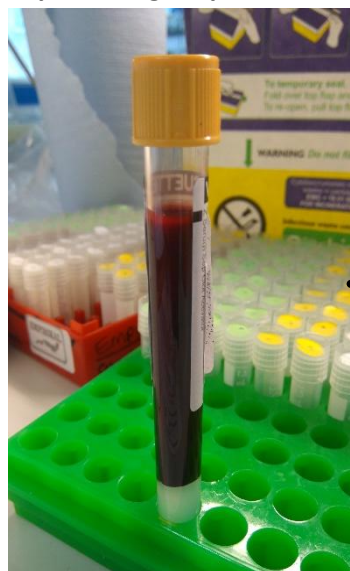

Orange top blood tube after centrifugation

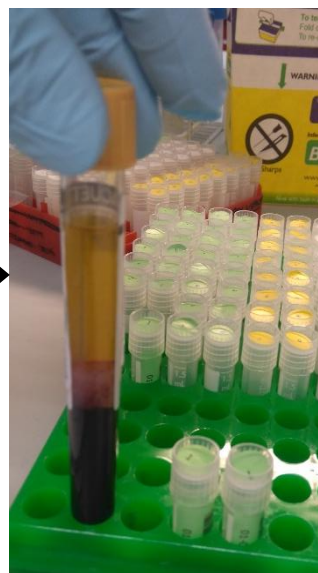

Centrifuge at 1200g for 10 mins at room 20 °C

Collect serum

4. While the sample is being spun record the date and time of sample processing on the research sample tracking form.
5. Aliquot serum (2 samples of roughly 0.5ml) into the supplied cryovials (Figure 2). Affix correct Progeny barcode (pre-provided to site) onto the outside of the cryovial. (For serum complement levels these barcodes are white. For serum antibodies to Mircococept and serum Mircococept levels these barcodes are green.) Take the circular white or green sticker (depending on the serum sample type, and stick on the top of the cryovial lid (see Figure 4).
6. Put both aliquots in the next free slots in the provided cryovial box, making a note of their location on the paper cryovial box map.
7. Store at -80oC.
8. Using the data on the sample tracking forms and cryovial box map record the date and time of sample collection, processing, storage box number and positon in the Progeny database.

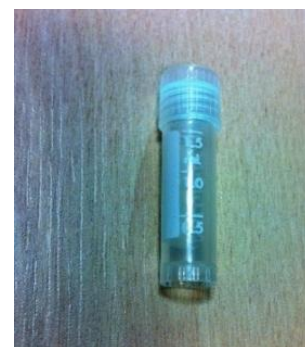

Figure 2: cryovial

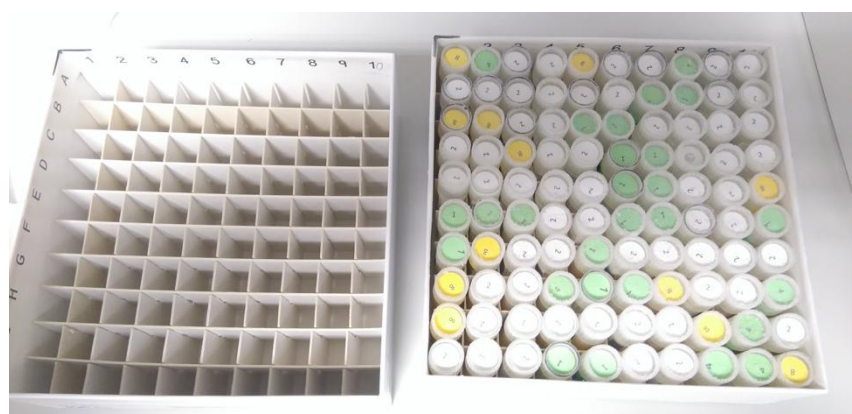

Figure 4: Labelled cryovials in box

## 2.3 Whole Blood Biomarker RNA (*cohort one patients only*)

1. At each time point fill two **blue** topped tempus tubes to the fill line. (see Figure 4).
2. Immediately mix by gently inverting the tube eight times.
3. Label the tube with the patient PIN (PXXXXX) and timepoint, use labels provided.
4. Record the date and time of sample collection on the research sample tracking form.
5. Put both blue topped tubes in the next free slots in the provided tempus tube rack, making a note of their location on the paper tempus tube rack map (see Figure 5).
6. Store at -20oC and record the time the samples were frozen on the research sample tracking form.
7. Log the location of the blue topped tubes on Progeny (rack number and position only). There are no barcodes for these samples, just write the patient PIN and timepoint on the tubes.

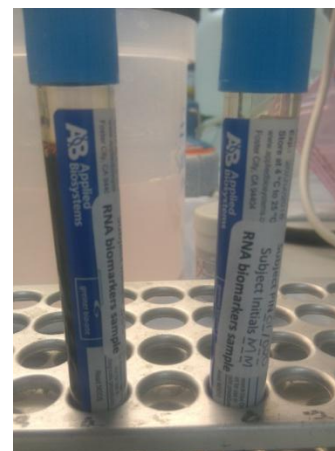

Figure 4: Blue topped tempus tube

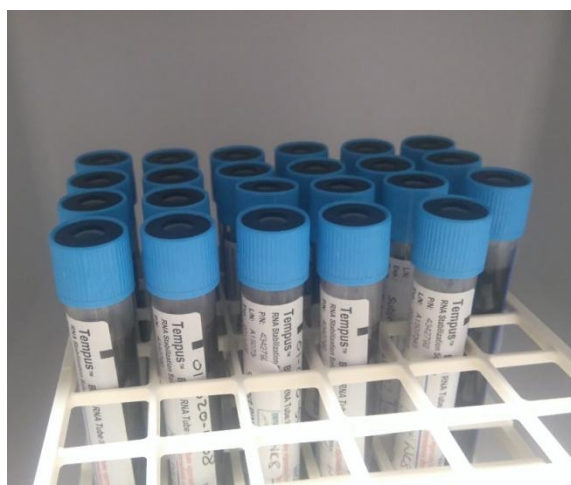

Figure 5: Tempus tubes stored in tempus rack

## 2.4 Plasma sample for SDMA levels

**N.B. This sample needs to be processed within 4 hours of collection; if processing isn't possible within 4 hours of collection (for example sample taken out of hours or at weekends) there is no need to collect the sample**

1. Fill the **green** topped tube to the fill line and invert 5 times to mix.
2. Record the date and time of sample collection on the research sample tracking form.
3. Centrifuge the tube at **1500g** for **10 minutes** at **4oC**.
4. While the sample is being spun record the date and time of sample processing on the research sample tracking form.
5. Aliquot plasma (1 sample of about 1.5ml) into the supplied cryovial. Affix correct Progeny barcode (pre-provided to site) to the outside of the cryovial. (For plasma SDMA level the barcode is yellow). Take the circular yellow sticker with a "8" and stick on the cryovial lid (see Figure 6).
6. Put the aliquot in the next free slot in the provided cryovial box, making a note of it's location on the paper cryovial box map.
7. Store at -80oC.
8. Using the data on the sample tracking forms and cryovial box map record the date and time of sample collection, processing, storage box number and position in the Progeny database.

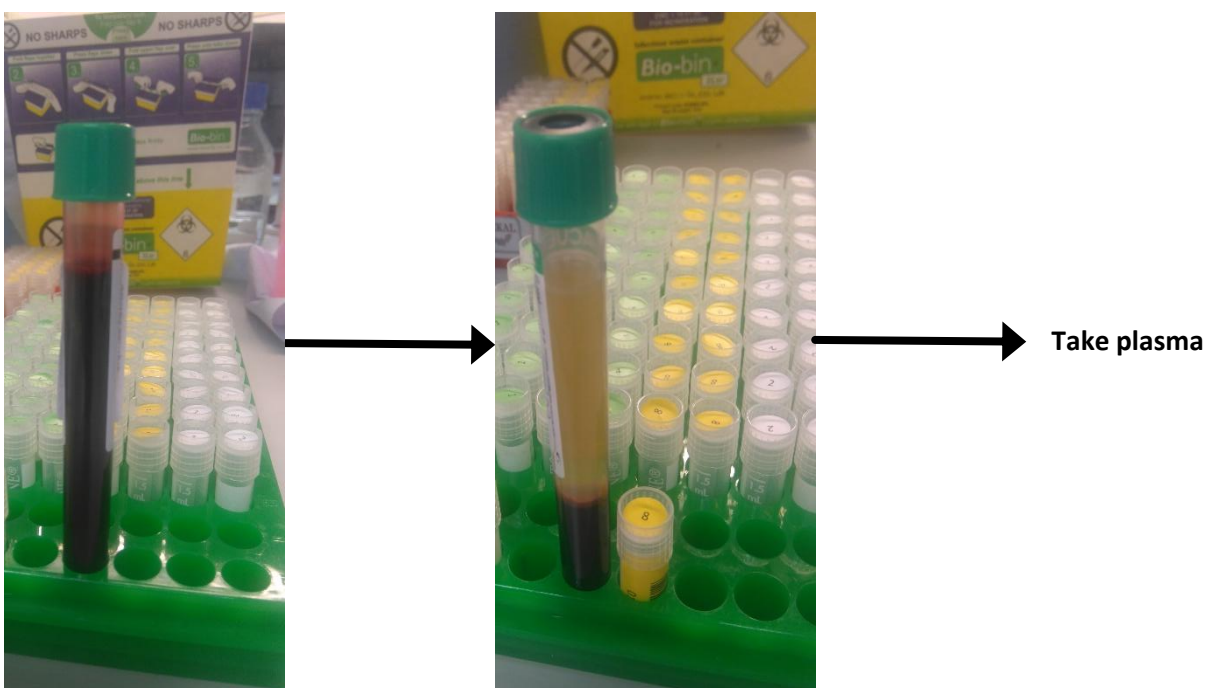



### 3. Urine Sample Collection

Collect up to 100ml of urine in 100ml Sarstedt pot (Figure 7) at the appropriate time points, and complete the processing from that single sample as required by the assessment schedule:

- Urine for markers of tubular damage on filter papers
- Urine for C3a levels
- **Guy's cohort 1 Only** Using any remaining unprocessed urine - Urine Biomarker RNA

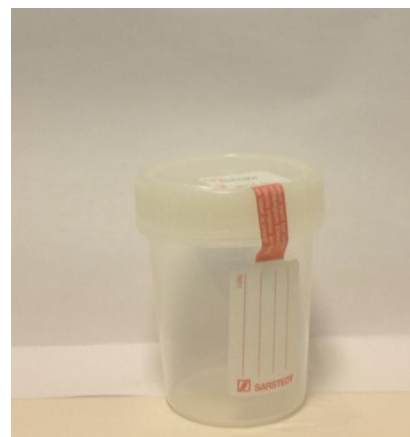

Figure 7: 100ml Sarstedt pot

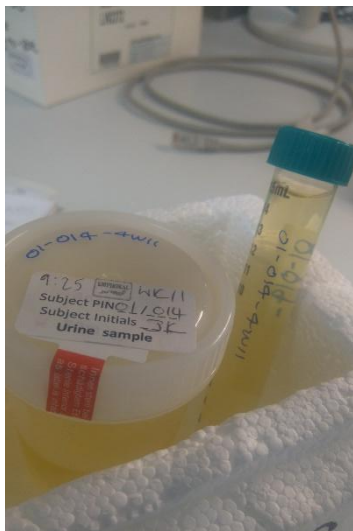

Figure 8: Urine samples on ice prior to processing

Important points to note for urine sample collection:

**Use one urine sample for all processing of urine at any given time point.**

**Urine collected must be processed within 4 hours of collection. If this isn't going to be possible (e.g. over the weekend) do not collect the sample.**

**Urine must be kept cold between collection and processing so keep unprocessed urine in the fridge or on ice (Figure 8).**

#### 3.1 Urine Filter Paper Samples

1. Take one foil packet per time point, remove the filter paper from the packet.
2. Take a sterile pipette and using the sample collected in the Sarstedt pot spot urine onto each of the circles on the filter card provided.
3. Dry at room temperature for one hour. While the filter paper is drying record the date and time of sample processing on the research sample tracking form.

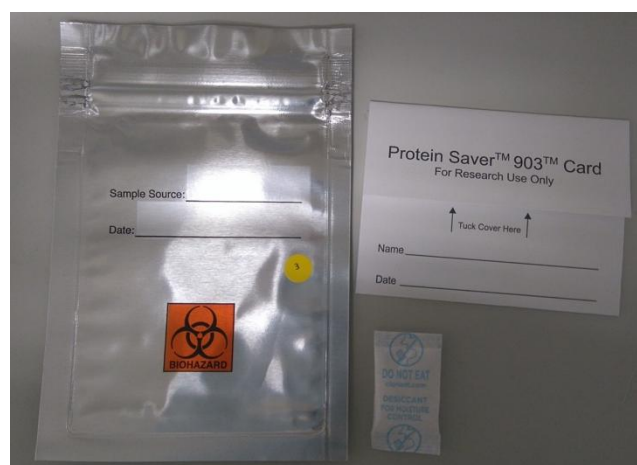

Figure 9: Urine filter paper, desiccant and bag



## CONFIDENTIAL

4. Affix one of the correct Progeny barcodes (pre-provided to site) onto the filter paper. (For urine filter paper samples these barcodes are yellow) and complete name and date sections on the filter card, for name use patient PIN, then place the card in the foil storage bags containing the desiccant tablet.

Front labelling of filter paper

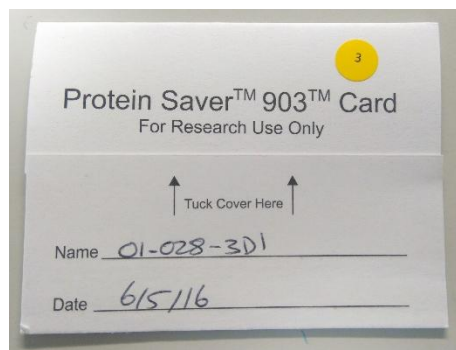

Back labelling of filter paper

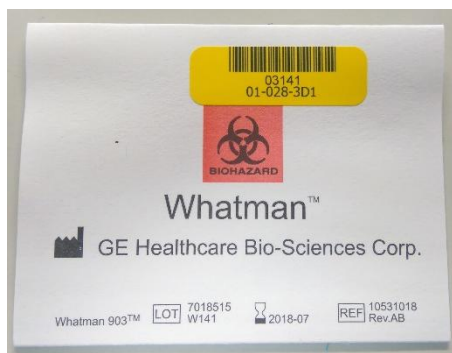

Labelled filter storage bag

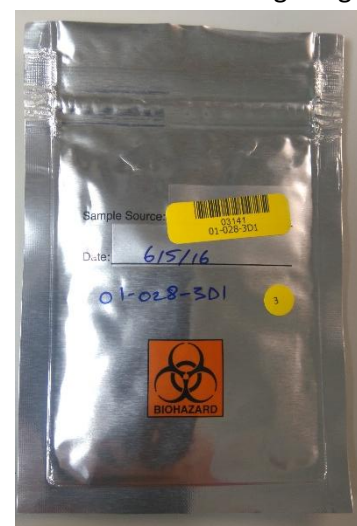

5. On the outside of the foil storage bags affix the second Progeny barcode relating to that sample (for urine filter paper samples two identical barcodes are provided per sample required) and in marker pen write the patient ID number and timepoint of sample. (For example "P08005 D2").

**If possible, prepare urine filters on days 1, 2 and 7. Once dry, store in their envelope at room temperature**

**For each time-point, put a drop of unspun urine onto all spots on one filter paper**

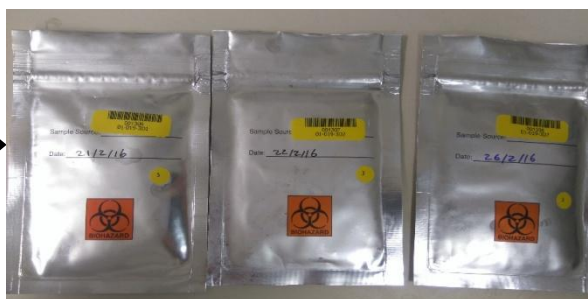

**Use 1 envelope per subject to send filters to PTL - Maximum of 3 filters per envelope.**

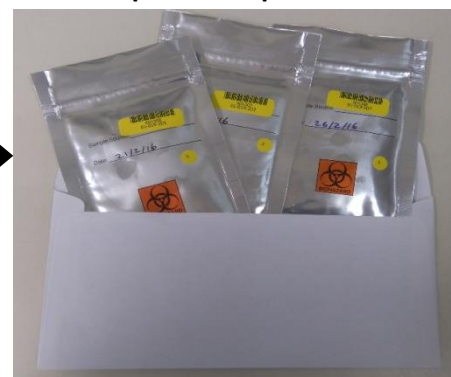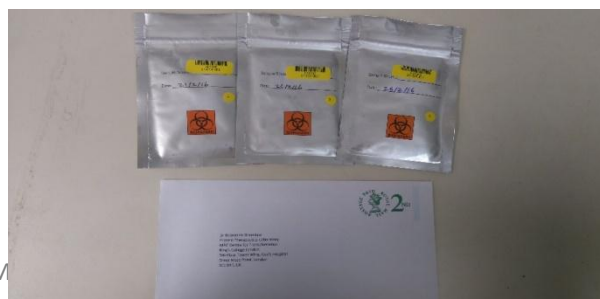

6. Samples collected for the **same** patient on **days 1, 2 and 7** should be batched together and all three mailed to the PTL (by day 12) in the same envelope using the prepaid envelopes and address labels provided to site. Use one envelope per patient – do not mix patient samples in the same envelope even if not all the timepoints were collected.
7. Send an email to [roseanna.greenlaw@kcl.ac.uk](mailto:roseanna.greenlaw@kcl.ac.uk) and [laura.nichols@kcl.ac.uk](mailto:laura.nichols@kcl.ac.uk) with date and which samples were sent. There is no need to log the urine filter paper samples on the Progeny database.
8. Repeat steps 1 to 7 for week 52 sample and mail to PTL within 5 days.

### 3.2 Urine Sample for C3a levels

N.B. if a urine filter card is required do this first then prepare the urine C3a samples as follows:

1. Put between 10 – 50ml urine into a suitable container and centrifuge at **1500g** at **4oC** for **15 minutes**. 50ml falcon tubes have been provided to sites for this but any tube can be used that best fits the centrifuge to be used.
2. While the sample is being spun record the date and time of sample processing on the research sample tracking form.
3. Aliquot supernatant (1 sample of roughly 1.5ml) into the supplied cryovial. Affix correct Progeny barcode (pre-provided to site) onto the outside of the cryovial. (For urine C3a levels these barcodes are green.) Take the circular green sticker with a “4” and stick on the cryovial lid.
4. Put the aliquot in the next free slot in the provided cryovial box, making on note of it's location on the paper cryovial box map.
5. Store at -80oC.
6. Using the data on the sample tracking forms and cryovial box map record the date and time of sample collection, processing, storage box number and position in the Progeny database.

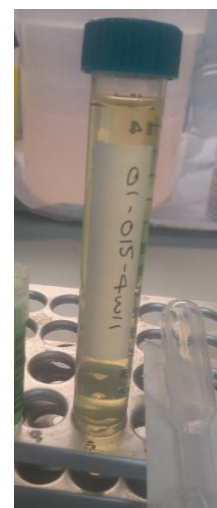

Figure 10: Urine in tube for spinning

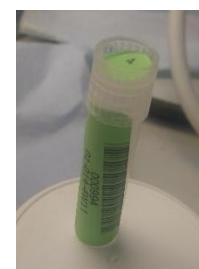

Figure 11: Supernatant in labelled cryovial

### 3.3 Biomarker RNA urine *Guy's cohort one only*

1. If there is any remaining urine after completing all other urine sampling keep the remaining urine in the Sarstedt pot in the fridge, or on ice, and contact Mano ([Manohursingh.runglall@kcl.ac.uk](mailto:Manohursingh.runglall@kcl.ac.uk)) as soon as possible.

## 4. Research Biopsy Tissue Collections

Trial biopsy collection for research purposes will initially be at the Guy's site only. The study may request additional support from other sites if additional month 3 biopsy samples are needed.

### 4.1 *Guy's only Research Biopsy tissue collection*

Important points to note for biopsy sample collection:

- **Trial biopsy samples will be collected and preserved in Michels solution. Michels solution must be handled with care and only use when wearing protective clothing, including gloves.**
  - **Biopsy samples should be stored at room temperature and will be transferred to PTL within 72 hours +/- 2 days.**
1. At the time of the transplant two biopsy samples will be taken as per local practice; pre perfusion with blood and IMP (labelled A) and after transplantation following perfusion with blood and IMP (labelled B). Standard clinical care at Guy's hospital is to take two cores; it has been agreed that ½ of one of these cores can be given for trial purposes.
  2. The designated ½ of one of the cores taken is to be immersed in a cryovial containing 1.5ml of Michels solution. (Prior to use the cryovials are stored in the Soltran fridge in theatres; for each patient two cryovials should be used one labelled "A" for the pre perfusion biopsy and one labelled "B" for the post perfusion biopsy.
  3. The biopsy sample tracking form should be completed with the time both biopsies were taken. The samples should then be stored at room temperature until collection.
  4. The sample will be processed (snap-frozen), within 5 days of being taken, by a member of the PTL trial team. The date and times of collection and processing will then be added to the Progeny database by the PTL trial team.
  5. If the patient consents to the optional 3 month biopsy this should be processed as above.

## 5. Shipping of samples

The EMPIRIKAL Project Manager will arrange and pay for dry ice shipment of all stored samples to the PTL during the trial. With the exception of urine filter papers, which will be sent in the prepaid envelopes provided as outlined in section 3.1 above.

If your centre runs out of storage space please contact the EMPIRIKAL Clinical Project Manager to arrange sample collection.

## Appendix A: Barcode labelling

The table below outlines the bar-coding system code.

| Time points                                                          |
|----------------------------------------------------------------------|
| T <sub>0</sub> = baseline before transplantation with perfused organ |
| D = day                                                              |
| W= week                                                              |
| T <sub>1</sub> – 1 hour after transplantation (+ 1 hour)             |
| T <sub>4</sub> – 4 hours after transplantation (+ 4 hours)           |

| Samples                           | Vessel       | Sample code | Barcode label color           | Number of samples to be collected | Number of aliquots to be stored                 |
|-----------------------------------|--------------|-------------|-------------------------------|-----------------------------------|-------------------------------------------------|
| Serum antibodies to Mirococept    | Cryovial     | 1           | Green                         | 1                                 | 2                                               |
| Serum Mirococept                  | Cryovial     | 1           | Green                         | 1                                 | 2                                               |
| Serum Complement                  | Cryovial     | 2           | White                         | 1                                 | 2                                               |
| Plasma SDMA                       | Cryovial     | 8           | Yellow                        | 1                                 | 1                                               |
| Whole blood RNA                   | Tempus tube  | N/A         | N/A use standard Tempus label | 2                                 | N/A no processing required freeze tube directly |
| Urine Filter Papers               | Filter paper | 3           | Yellow                        | 1                                 | 1                                               |
| Urine C3a                         | Cryovial     | 4           | Green                         |                                   | 1                                               |
| Guy's Only - Urine RNA Biomarkers | N/A          |             |                               |                                   |                                                 |
| Guy's Only - Biopsy               | Cryovial     | 7           | Green                         | 1                                 | N/A                                             |

### Patient Sample Labelling

The first two digits identify the site e.g. Guy's = 01 and the next three is the number of the patient at that site.

|           |             |             |            |            |
|-----------|-------------|-------------|------------|------------|
| <b>01</b> | <b>001</b>  | <b>2</b>    | <b>W4</b>  | <b>1</b>   |
| Site      | Patient PIN | Sample code | Time point | Aliquot(s) |

On Progeny this sample would be displayed as 01-001-2W4\_1. This means: Guy's Patient number 1 serum complement sample at week 4 and this is aliquot 1.

|            |             |             |            |
|------------|-------------|-------------|------------|
| <b>P05</b> | <b>011</b>  | <b>8</b>    | <b>T0</b>  |
| Site       | Patient PIN | Sample code | Time point |

On Progeny this sample would be displayed as 05-011-8T0. This means: St. George's patient number 11 plasma SDMA sample at baseline (time 0).

## Appendix B: Research Samples Summary Table

| Research Samples Summary Table       |                                              |                                                                    |                                |                                                                                                                                                                                                        |          |                        |                                                                                                        |
|--------------------------------------|----------------------------------------------|--------------------------------------------------------------------|--------------------------------|--------------------------------------------------------------------------------------------------------------------------------------------------------------------------------------------------------|----------|------------------------|--------------------------------------------------------------------------------------------------------|
| Sample                               | Time point Collected                         | Collection tube                                                    | Spin Speed/Time/ Temperature   | Instructions                                                                                                                                                                                           | Aliquots | Barcode Colour/ Number | Storage                                                                                                |
| Serum for complement levels          | Day 0, 1, 2, 3, 4 weeks 2 and 4              | Orange topped tube                                                 | 1200g for 10mins at room temp  | Invert 5 times, allow to clot for 30 min. Centrifuge within 72 hrs.                                                                                                                                    | 2        | White/2                | -80°C                                                                                                  |
| Serum for antibodies to Mirococept   | Weeks 2, 4 and 10                            | Orange topped tube                                                 | 1200g for 10 mins at room temp | Invert 5 times, allow to clot for 30 min at room temp. Centrifuge within 72 hrs.                                                                                                                       | 2        | Green/1                | -80°C                                                                                                  |
| Guy's Only - Serum Mirococept levels | Day 1                                        | Orange topped tube                                                 | 1200g for 10 mins at room temp | Invert 5 times, allow to clot for 30 min at room temp. Centrifuge within 72 hrs.                                                                                                                       | 2        | Green/1                | -80°C                                                                                                  |
| Plasma for SDMA levels               | Day 0, 1, 2, 7 week 52                       | Green topped tube                                                  | 1500g for 10 min at 4 °C       | Invert 8 times, process immediately but at least within 4 hours.                                                                                                                                       | 1        | Yellow/ 8              | -80°C                                                                                                  |
| Urine for C3a levels                 | Day 1, 2, week 3, 10, 11, 12, 24, 36 and 52  | Urine pot transfer 10ml to falcon tube                             | 1500g for 15 mins at 4 °C      | Keep sample cold after collection and during processing. Process within 4 hours.                                                                                                                       | 1        | Green/4                | -80°C                                                                                                  |
| Urine filter papers                  | Day 1, 2, 7 week 52                          | Urine pot use pipette to spot urine on to each spot on filter card | Not Applicable                 | Use pipette to spot urine on to each spot on filter card. Leave to dry for at least 1 hour. Place dry card in silver envelope, Write on outside of silver envelope patient ID and time point of sample | N/A      | Yellow/ 3              | Mail within 5 days batching together day 1,2 and 7 – using prepaid envelope and address label provided |
| Whole Blood for RNA                  | Day 1, 2, 7, week 2, 4, 8, 12, 24, 36 and 52 | Blue topped Tempus tube                                            | Not Applicable                 | Fill two tubes at each time point. Invert tubes 8 times                                                                                                                                                | N/A      | N/A                    | -20°C                                                                                                  |

**Appendix C: Previous Versions**

| <b>Revision of Version / Date/ Reason for Amendment</b>                                                                                                                     | <b>Superseded by Version and date</b>        |
|-----------------------------------------------------------------------------------------------------------------------------------------------------------------------------|----------------------------------------------|
| Version 1, dated 16 <sup>th</sup> December 2013:<br>administrational updates to centrifuging methods.                                                                       | Version 2, dated 15 April 2015               |
| Version 2, dated 15 <sup>th</sup> April 2015: updated due to<br>protocol amendment changing the sample<br>collection schedule; changes to wording/formatting<br>for clarity | Version 3, dated 20 <sup>th</sup> July 2015  |
| Version 3, dated 29 <sup>th</sup> April 2016: updated with<br>simplified instructions and clarity for sites                                                                 | Version 4, dated 29 <sup>th</sup> April 2016 |
